# Supplementary material for: Blackjack mutations improve the on-target activities of increased fidelity variants of SpCas9 with 5′G-extended sgRNAs
Source: PubMed Central journal article supplement (PMC7060260; doi:10.1038/s41467-020-15021-5), 2020-03-06
Supplement: 41467_2020_15021_MOESM9_ESM.pdf [file 41467_2020_15021_MOESM9_ESM.pdf]

**Title:** Supplementary Data 1

**Description:** This file, which has multiple tabs, contains sgRNA, primer and sequence data.

**Title:** Supplementary Data 2

**Description:** This file contains the summary of targeted deep-sequencing data.

**Title:** Supplementary Data 3

**Description:** This file, which has multiple tabs, contains the summary of GUIDE-seq data.

**Title:** Supplementary Data 4

**Description:** This file, which has multiple tabs, contains data of the Figures.

**Title:** Supplementary Data 5

**Description:** This file, which has multiple tabs, contains data of the Supplementary Figures.

**Title:** Supplementary Data 6

**Description:** This file, which has multiple tabs, contains summaries of the data distributions and statistical details related to each of the manuscript Figures.
